# Supplementary material for: Antimicrobial and Wound Healing Properties of FeO Fabricated Chitosan/PVA Nanocomposite Sponge
Source: MDPI journal article supplement (doi:10.3390/antibiotics10050524), 2021-05-03
Supplement: s1 [file s1]

Article

# Antimicrobial and Wound Healing Properties of FeO Fabricated Chitosan/PVA Nanocomposite Sponge

Anbazhagan Sathiyaseelan, Kandasamy Saravanakumar, Arokia Vijay Anand Mariadoss and Myeong-Hyeon Wang \*

Department of Bio-Health Convergence, Kangwon National University, Chuncheon 200-701, Korea; sathiyaseelan.bio@gmail.com (A.S.); saravana732@gmail.com (K.S.); mavijaibt@gmail.com (A.V.A.M.)

\* Correspondence: mhwang@kangwon.ac.kr

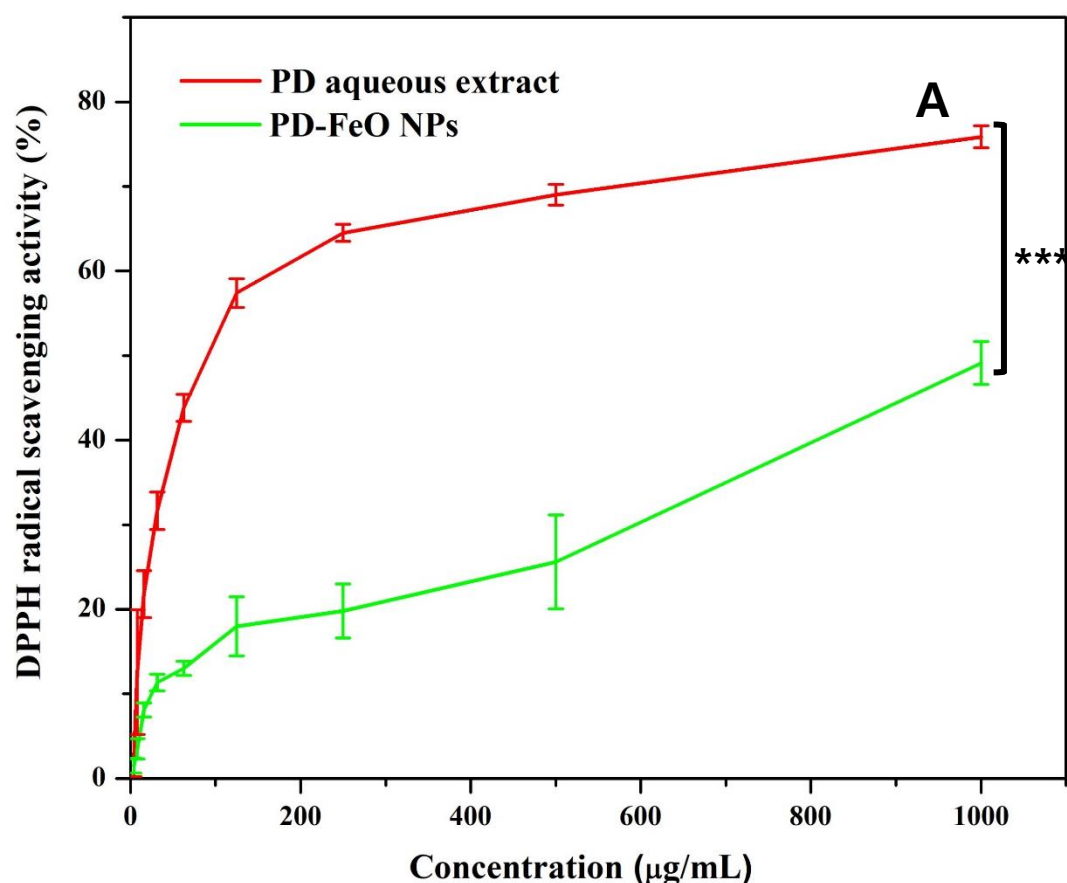

**Figure S1.** DPPH radical scavenging activity. Aqueous extract of *Pinus densiflora* (PD aqueous extract) and PD aqueous extract mediated iron oxide nanoparticles (PD-FeO NPs). \*\*\*  $p < 0.001$ .

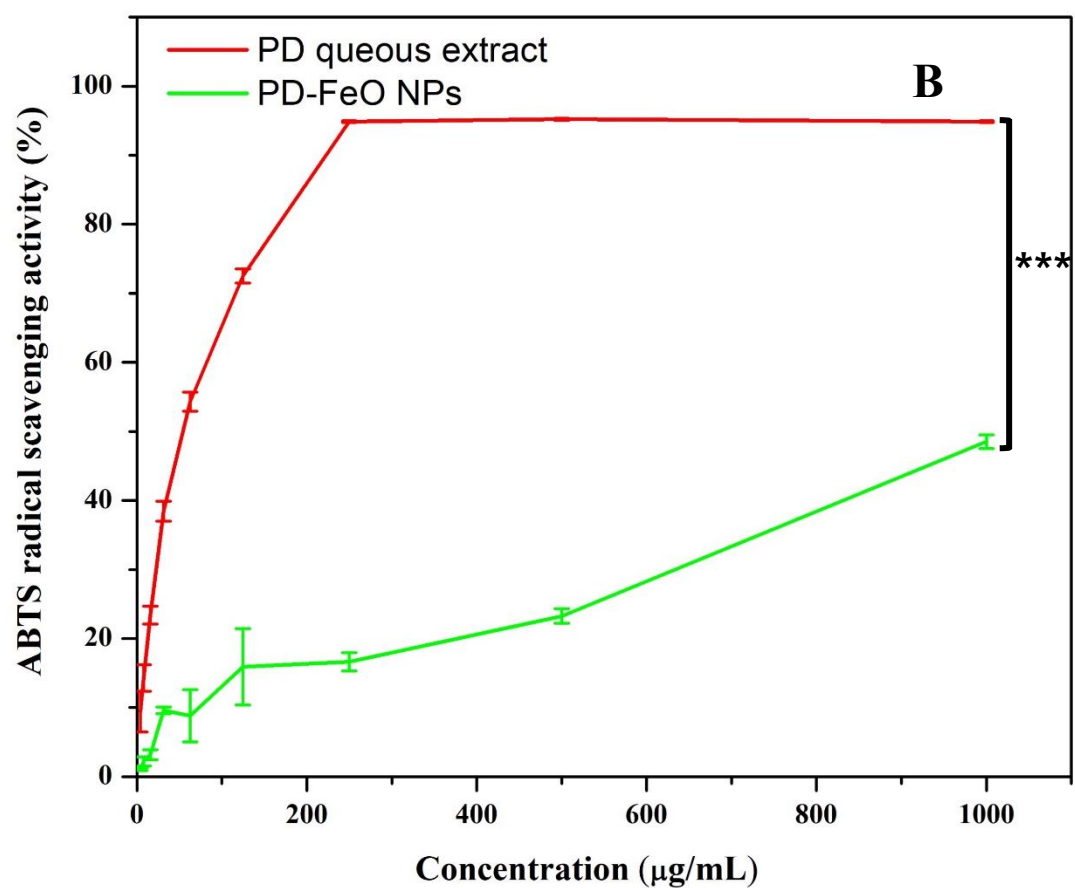

**Figure S2.** ABTS radical scavenging activity. Aqueous extract of *Pinus densiflora* (PD aqueous extract) and PD aqueous extract mediated iron oxide nanoparticles (PD-FeO NPs). \*\*\*  $p < 0.001$ .

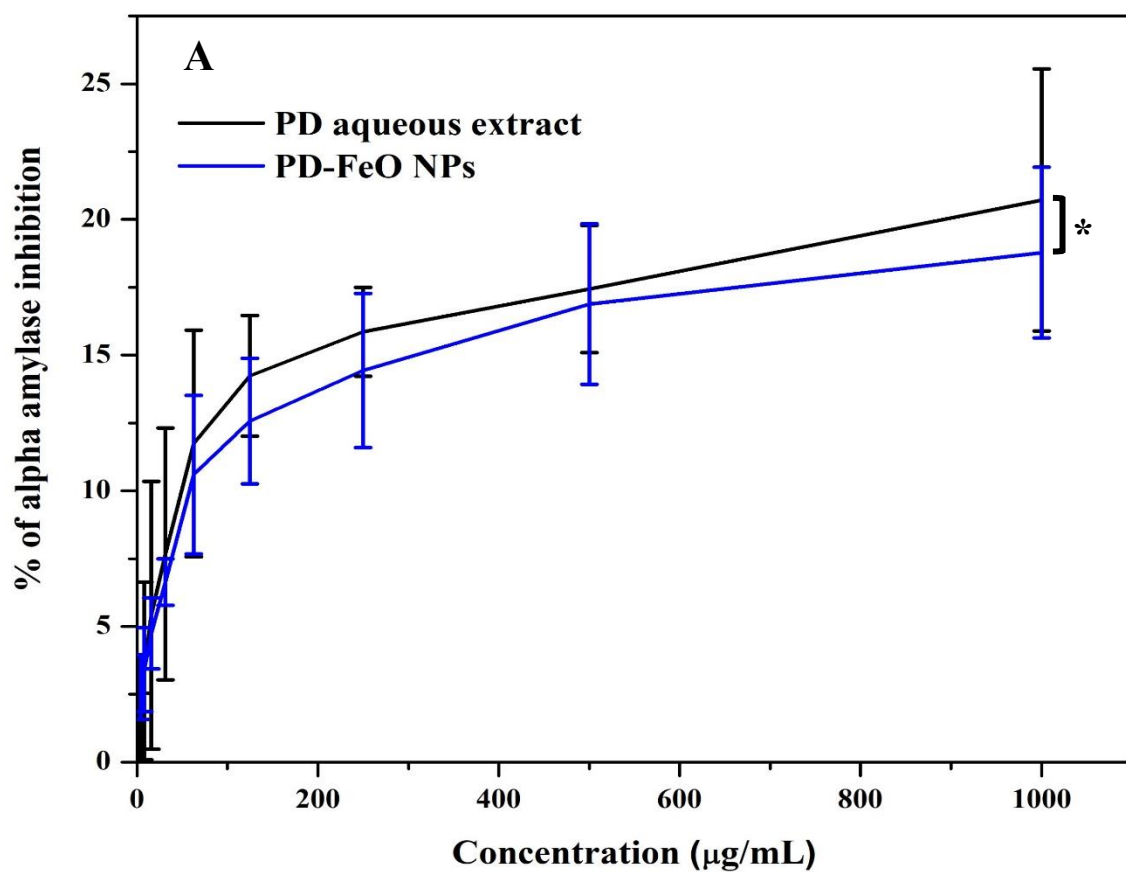

**Figure S3.** Alpha-glucosidase enzyme inhibitory activity. Aqueous extract of *Pinus densiflora* (PD aqueous extract) and PD aqueous extract mediated iron oxide nanoparticles (PD-FeO NPs).

\*  $p < 0.05$  significant.

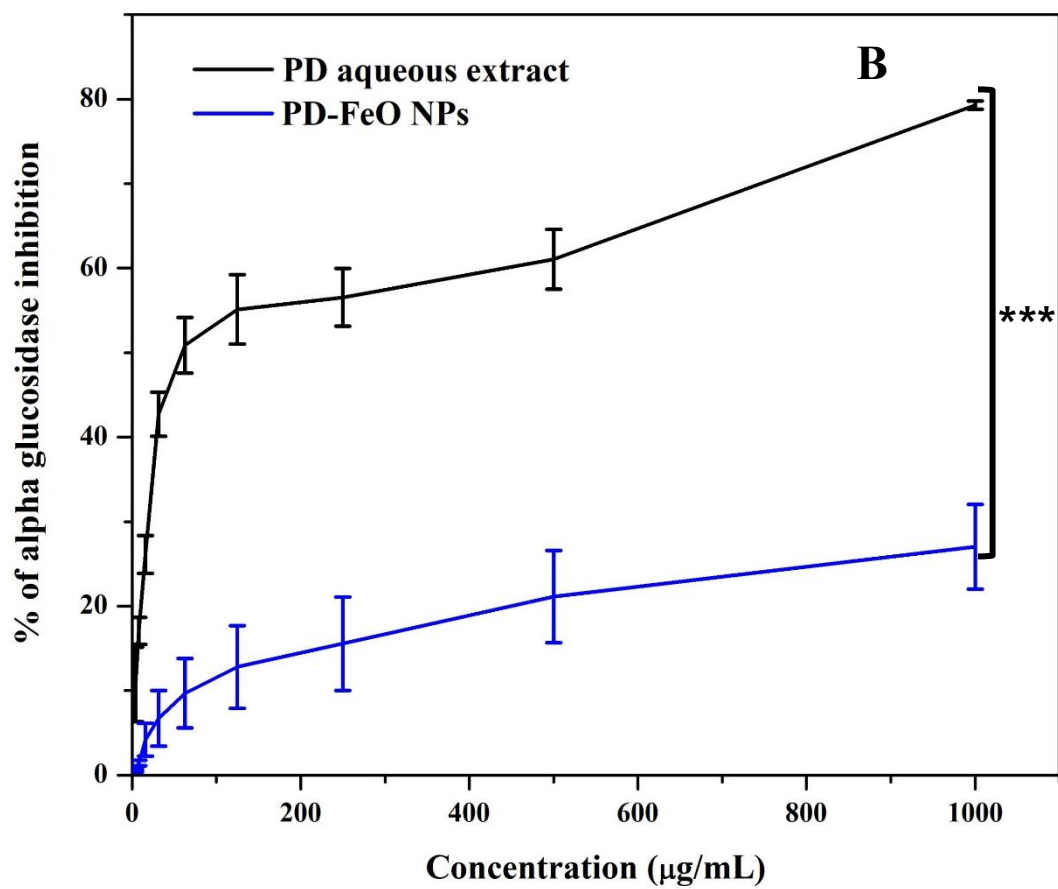

**Figure S4.** Alpha-amylase enzyme inhibitory activity. Aqueous extract of *Pinus densiflora* (PD aqueous extract) and PD aqueous extract mediated iron oxide nanoparticles (PD-FeO NPs). \*\*\*  $p < 0.001$ .

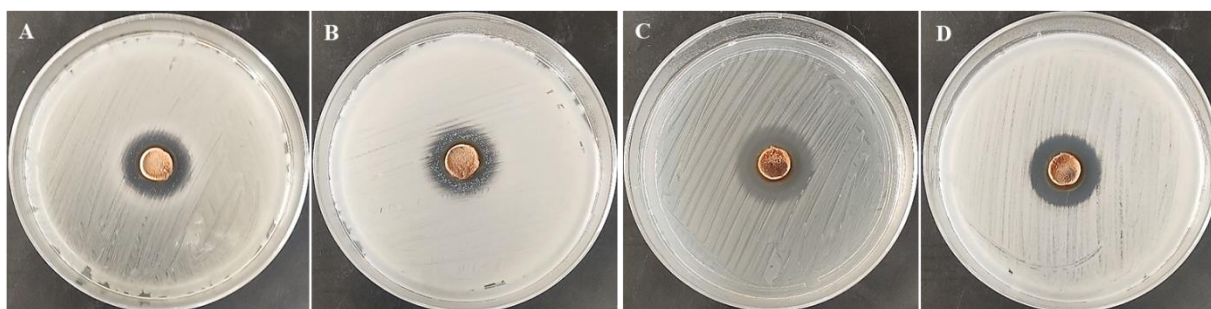

**Figure S5.** Antibacterial activity of CS/PVA-PD-FeO NPs sponges. *Bacillus cereus* – A; *Staphylococcus aureus* - B; *Escherichia coli* – C; *Salmonella enterica* – D.

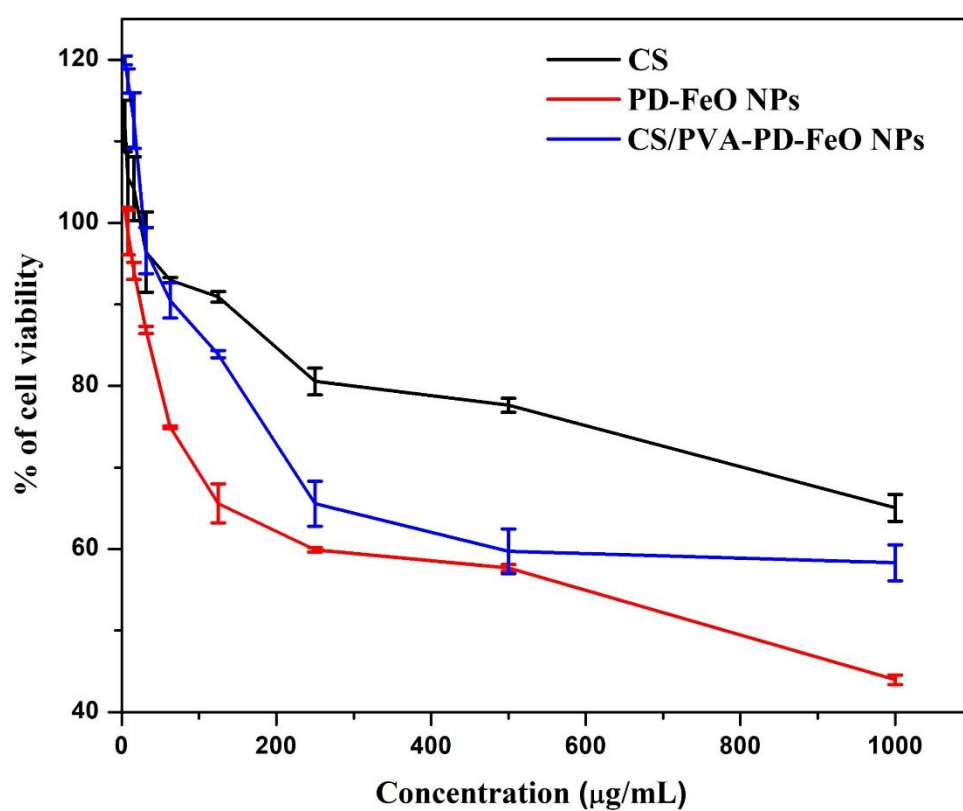

**Figure S6.** Cell viability. HEK293 cells treated with CS, PD-FeO NPs, and CS/PVA-PD-FeO NPs (0.01%).
